# Supplementary material
Source: publisher figshare collection journal article supplement (https://frontiersin.figshare.com/ndownloader/files/15743462)
Supplement: Supplementary file [file 15743462]

**Supplemental Table III. CpG site methylation in primary and cultured MCL cells.**

|                |                   | # of CpG sites with changed methylation |          |                          |          |
|----------------|-------------------|-----------------------------------------|----------|--------------------------|----------|
|                | Read depth >=10   | >=50% methylation change                |          | >=70% methylation change |          |
|                | Total site number | Increase                                | Decrease | Increase                 | Decrease |
| RL-P==>RL1-C1* | 2186253           | 3671                                    | 6587     | 234                      | 481      |
| RL-P==>RL1-C2  | 1901699           | 3872                                    | 7411     | 246                      | 623      |
| RL-P==>RL2-C1  | 2245753           | 4352                                    | 8048     | 304                      | 649      |
| RL-P==>RL2-C2  | 2283968           | 5838                                    | 9618     | 437                      | 931      |

\*Abbreviations: RL-P; patient's primary MCL cells, RL1 and RL2; sub-lines of MCL-RL cell line, C1 and C2; cells cultured for 3 and 5 months, respectively.
